# Supplementary material for: Iron Oxychalcogenides and Their Photocurrent Responses
Source: PubMed Central journal article supplement (PMC10880050; doi:10.1021/acs.inorgchem.3c03672), 2024-02-02
Supplement: ic3c03672_si_001.pdf [file ic3c03672_si_001.pdf]

## Supporting information: Iron oxychalcogenides and their photocurrent responses

Sandy Al Bacha<sup>a,b,c</sup>, Sébastien Saitzek<sup>d</sup>, Houria Kabbour<sup>a\*</sup>, Emma E. McCabe<sup>c\*</sup>

<sup>a</sup> Univ. Lille, CNRS, Centrale Lille, ENSCL, Univ. Artois, UMR 8181 – UCCS – Unité de Catalyse et Chimie du Solide, F-59000 Lille, France

<sup>b</sup> University of Kent, School of Physical Sciences, Canterbury, Kent CT2 7NH, U.K

<sup>c</sup> Durham University, Department of Physics, Durham DH1 3LE, U.K.

<sup>d</sup> Univ. Artois, CNRS, Centrale Lille, Univ. Lille, UMR 8181, Unité de Catalyse et Chimie du Solide (UCCS), F-62300 Lens, France.

Corresponding authors: [houria.kabbour@univ-lille.fr](mailto:houria.kabbour@univ-lille.fr) ; [emma.mccabe@durham.ac.uk](mailto:emma.mccabe@durham.ac.uk)

### Supporting information:

#### 1) Synthesis and preliminary characterisation of CaFeOQ and La<sub>2</sub>O<sub>2</sub>Fe<sub>2</sub>OQ<sub>2</sub> samples

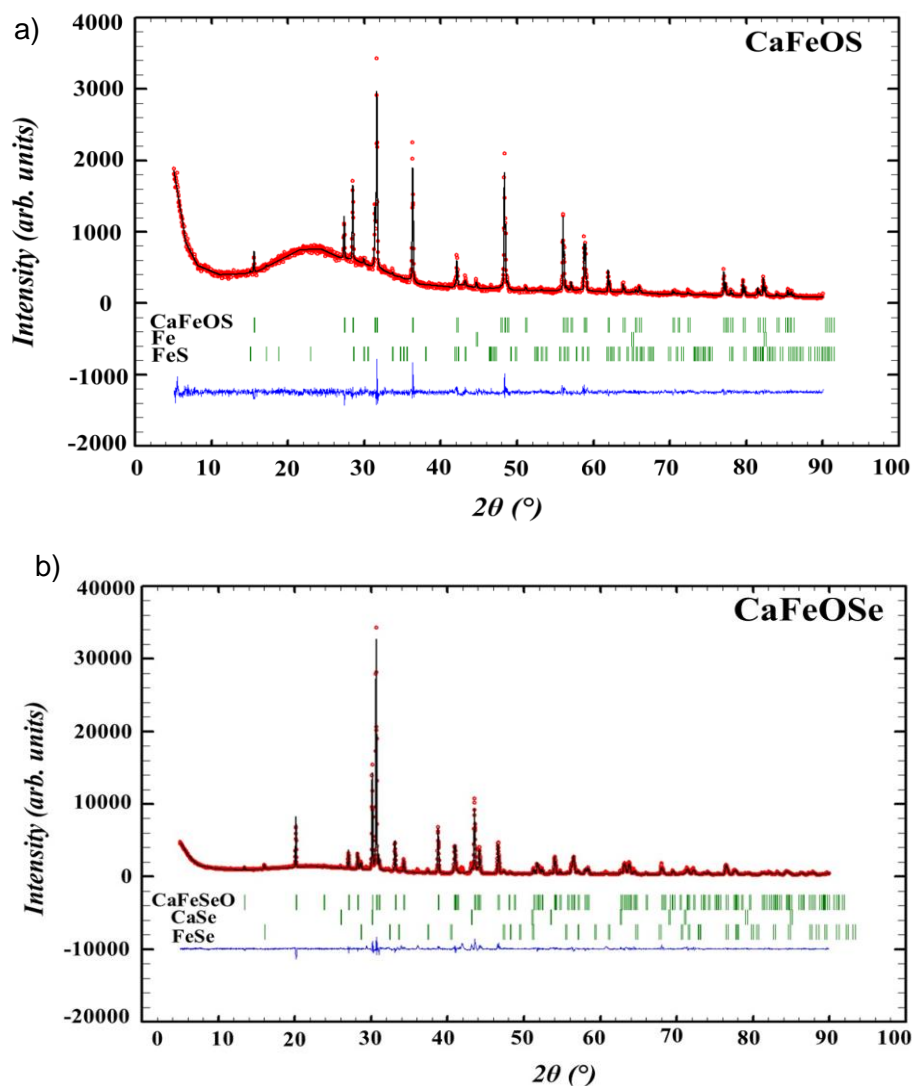

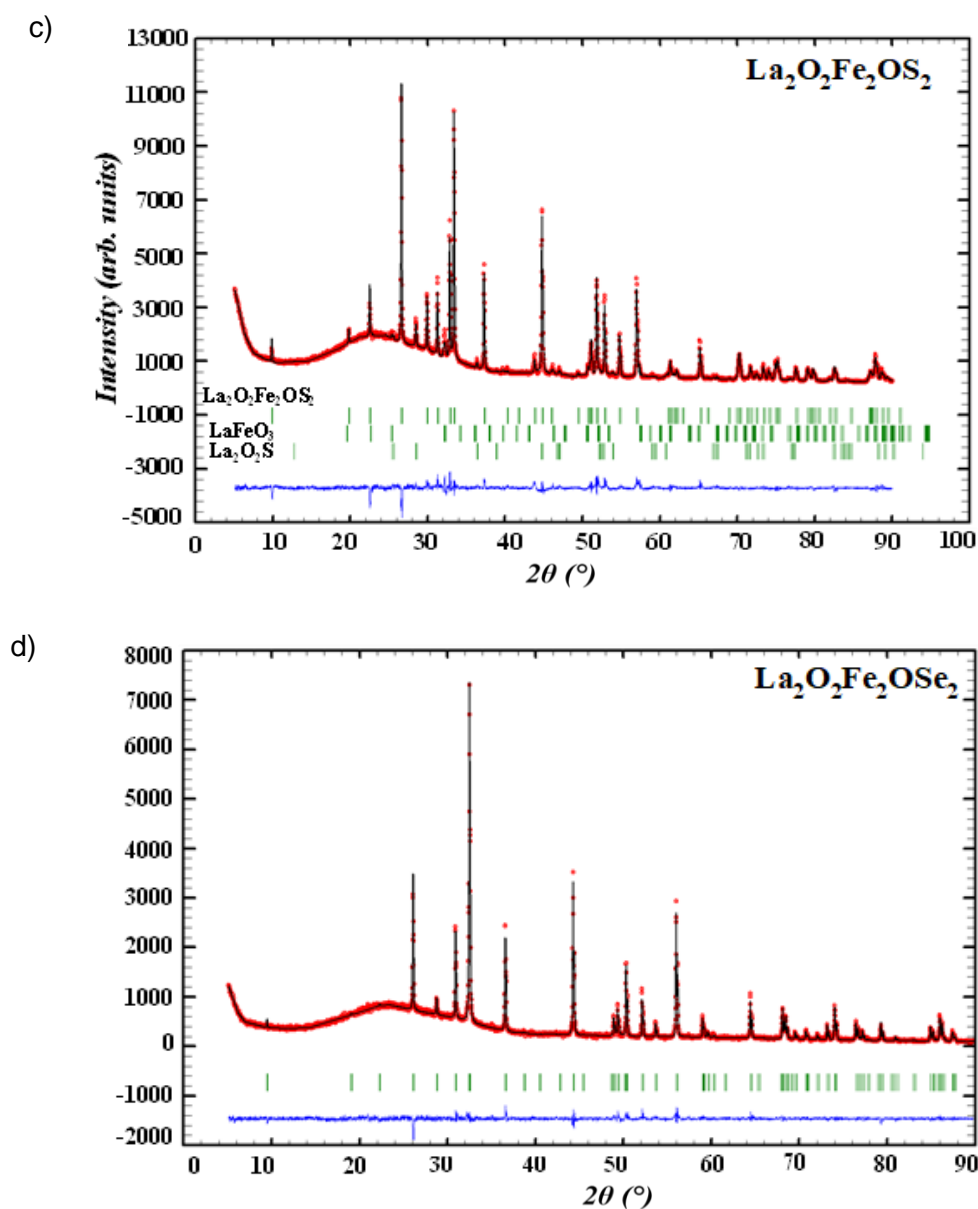

Figure S11 Powder XRD Rietveld refinement profiles: the experimental (red) and the calculated (black) patterns are superimposed; the difference curve and Bragg positions are shown in blue and green, respectively of (a) CaFeOS (95.59%), Fe (0.71%), FeS (3.70%) and (b) CaFeOSe (93.30%), CaSe (2.06%), FeSe (4.65%); (c) La<sub>2</sub>O<sub>2</sub>Fe<sub>2</sub>OS<sub>2</sub> (88.49%), LaFeO<sub>3</sub> (7.30%), La<sub>2</sub>O<sub>2</sub>S (4.20%) and (d) La<sub>2</sub>O<sub>2</sub>Fe<sub>2</sub>OSe<sub>2</sub>.

Table SI1 Refinement details from Rietveld refinement using room temperature XRPD data.

|                             |                            | CaFeOS                  | CaFeOSe                 | La <sub>2</sub> O <sub>2</sub> Fe <sub>2</sub> OS <sub>2</sub> | La <sub>2</sub> O <sub>2</sub> Fe <sub>2</sub> OSe <sub>2</sub> |
|-----------------------------|----------------------------|-------------------------|-------------------------|----------------------------------------------------------------|-----------------------------------------------------------------|
| <b>Space group</b>          |                            | <i>P6<sub>3</sub>mc</i> | <i>Cmc2<sub>1</sub></i> | <i>I4/mmm</i>                                                  | <i>I4/mmm</i>                                                   |
| <b>Unit cell parameters</b> | <b>a (Å)</b>               | 3.7613(1)               | 3.8925(1)               | 4.0438(1)                                                      | 4.0862(1)                                                       |
|                             | <b>b (Å)</b>               | 3.7613(1)               | 13.1878(2)              | 4.0438(1)                                                      | 4.0862(1)                                                       |
|                             | <b>c (Å)</b>               | 11.3893(2)              | 5.9260(1)               | 17.8995(3)                                                     | 18.6028(2)                                                      |
|                             | <b>V (Å<sup>3</sup>)</b>   | 139.54(1)               | 304.20(1)               | 292.70(1)                                                      | 310.61(1)                                                       |
| <b>Fitting statistics</b>   | <b>χ<sup>2</sup></b>       | 1.49                    | 9.02                    | 3.86                                                           | 1.80                                                            |
|                             | <b>R<sub>exp</sub> (%)</b> | 5.91                    | 3.39                    | 3.32                                                           | 5.43                                                            |
|                             | <b>R<sub>wp</sub> (%)</b>  | 7.20                    | 10.2                    | 6.53                                                           | 7.28                                                            |
|                             | <b>R<sub>p</sub> (%)</b>   | 5.47                    | 7.16                    | 4.70                                                           | 5.43                                                            |

## 2) Estimated band edge positions for La<sub>2</sub>O<sub>2</sub>Fe<sub>2</sub>OQ<sub>2</sub> and CaFeQO

The band edge positions for La<sub>2</sub>O<sub>2</sub>Fe<sub>2</sub>OQ<sub>2</sub> and CaFeQO (Q = S, Se) were estimated using an empirical method<sup>1-3</sup> based on Mullikan electronegativities using equation 1:

$$E_{VB,CB} = E_0 + \prod_{M=1}^n \chi_M^{j^{1/n}} \pm E_{gap}/2 \quad (1)$$

where  $E_{VB,CB}$  corresponds to the positions of the valence and conduction band edges,  $E_0$  to the difference bwrween NHE and the vacuum ( $E_0 = -0.45$  eV),  $\chi_M$  is the atom  $M$ 's electronegativity on the Mulliken scale with  $n$  the number of atoms and  $j$  the stoichiometric ratio. The results are summarized in Table SI2.

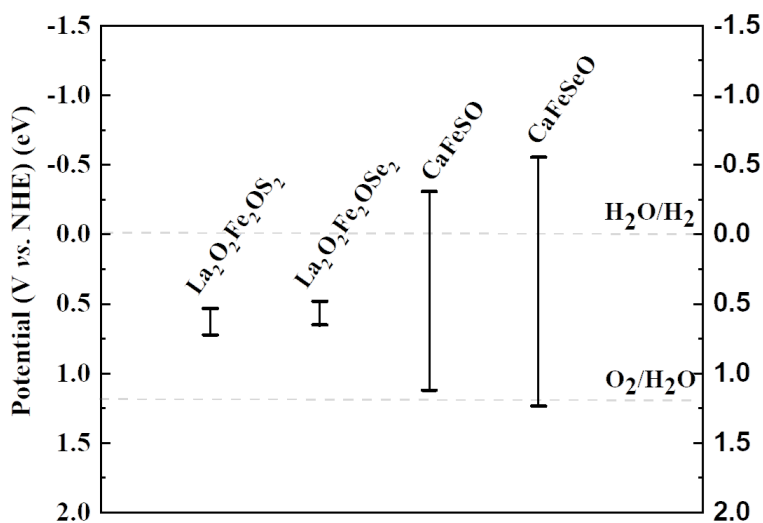

Figure SI2 Calculated band edges positions for CaFeOS and CaFeOSe. The levels of H<sub>2</sub> and O<sub>2</sub> evolution are indicated by dashed lines.

Table SI2 Optical bandgap and the relative band edges position.

| Composition                                                                  | Optical bandgap (eV) | Band edges position |         |
|------------------------------------------------------------------------------|----------------------|---------------------|---------|
|                                                                              |                      | CB                  | VB      |
| CaFeOS                                                                       | 1.43(1)              | -0.31(2)            | 1.12(2) |
| CaFeOSe                                                                      | 2.11(1)              | -0.71(2)            | 1.4(1)  |
| La <sub>2</sub> O <sub>2</sub> Fe <sub>2</sub> OS <sub>2</sub> <sup>4</sup>  | 0.24                 | 0.53(2)             | 0.72(2) |
| La <sub>2</sub> O <sub>2</sub> Fe <sub>2</sub> OSe <sub>2</sub> <sup>4</sup> | 0.19                 | 0.48(2)             | 0.65(2) |

Both the magnitude of the optical band gaps and the band edge positions show the potential of CaFeOQ (Q = S, Se) for photocathodic solar water splitting reactions whilst La<sub>2</sub>O<sub>2</sub>Fe<sub>2</sub>OQ<sub>2</sub> (Q = S, Se) are unlikely to be photocatalytically active for water splitting reactions.

### 3) Photocurrent measurements of CaFeQO samples

CaFeSeO absorbs in the visible spectrum (400 – 700 nm), consistent with the optical bandgap measured by diffuse reflectance (Figure 2). The photocurrent response was measured for a range a wavelengths (for  $V_{bias} = 0, 0.4$  V, Figure SI3) and the highest response was observed for 450 nm irradiation.

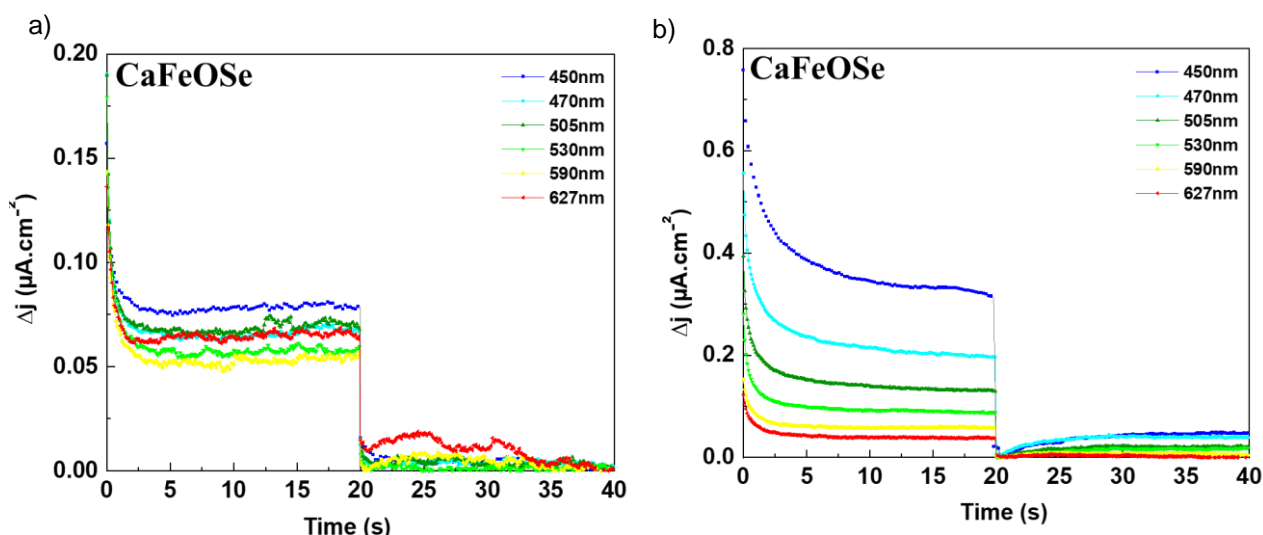

Figure SI3 Transient photocurrent response vs. wavelengths (constant light intensity  $\phi_0 = 42 \text{ mW cm}^{-2}$ ) for CaFeSeO with (a)  $V_{bias} = 0.4$  V and (b)  $V_{bias} = 0.0$  V.

#### 4) Oxidation of CaFeSO

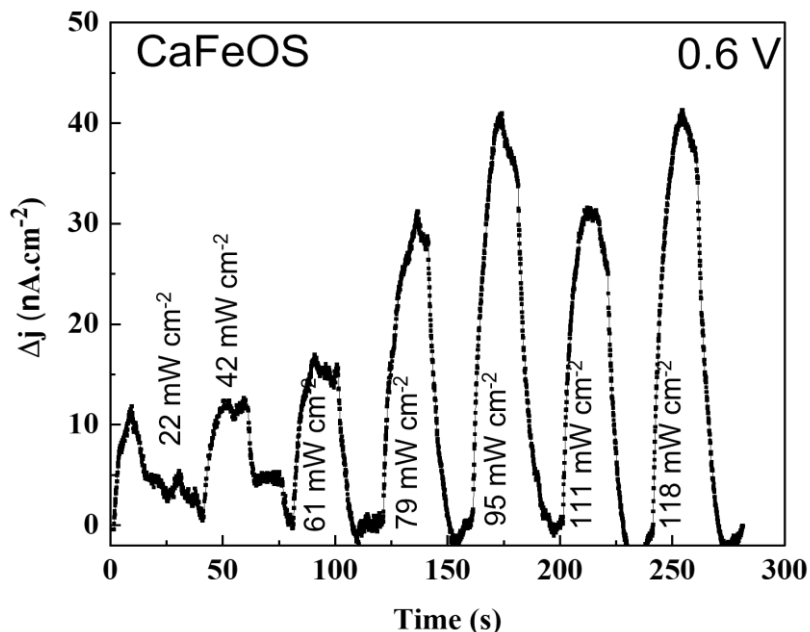

Figure S14 Transient photocurrent under several light power densities (450 nm) of CaFeSO at  $V_{\text{bias}} = 0.6$  V

A linear sweep measurement was carried out on CaFeSO (in 0.1 M  $\text{Na}_2\text{SO}_4$  electrolyte) (Figure S15). An oxidation reaction is observed for  $V \geq 0.7$  V, consistent with the redox potential of  $\text{Fe}^{2+}/\text{Fe}^{3+}$  and the oxidation reaction  $\text{Fe}^{2+} \rightleftharpoons \text{Fe}^{3+} + e^-$ . This oxidative degradation of the CaFeSO material likely explains the poor photocurrent response measured.

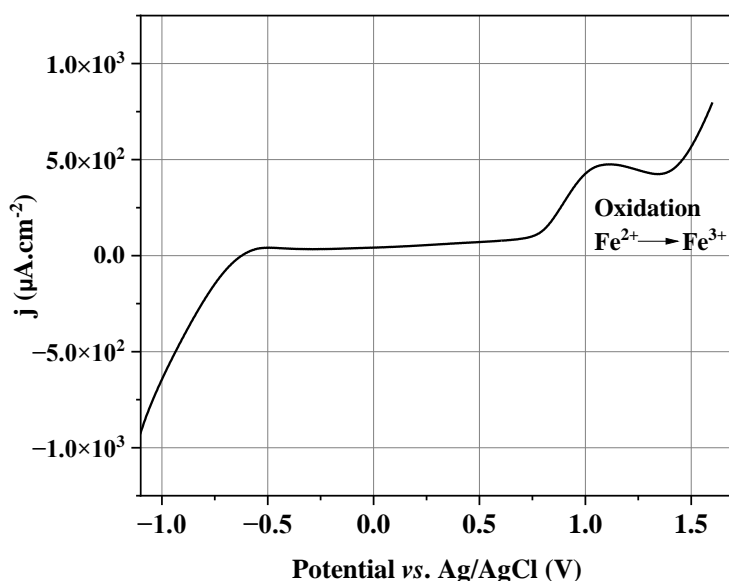

Figure S15 Linear sweep plot for CaFeOS.

#### 5) Photocurrent measurements of $\text{La}_2\text{O}_2\text{Fe}_2\text{OQ}_2$ samples

$\text{La}_2\text{O}_2\text{Fe}_2\text{OQ}_2$  have much smaller band gaps with absorption spanning the IR range (700 nm – 1 mm) and so can also absorb higher energy light from the visible range. Maximum photocurrents were measured at 470 nm for both these phases (Figure S16).

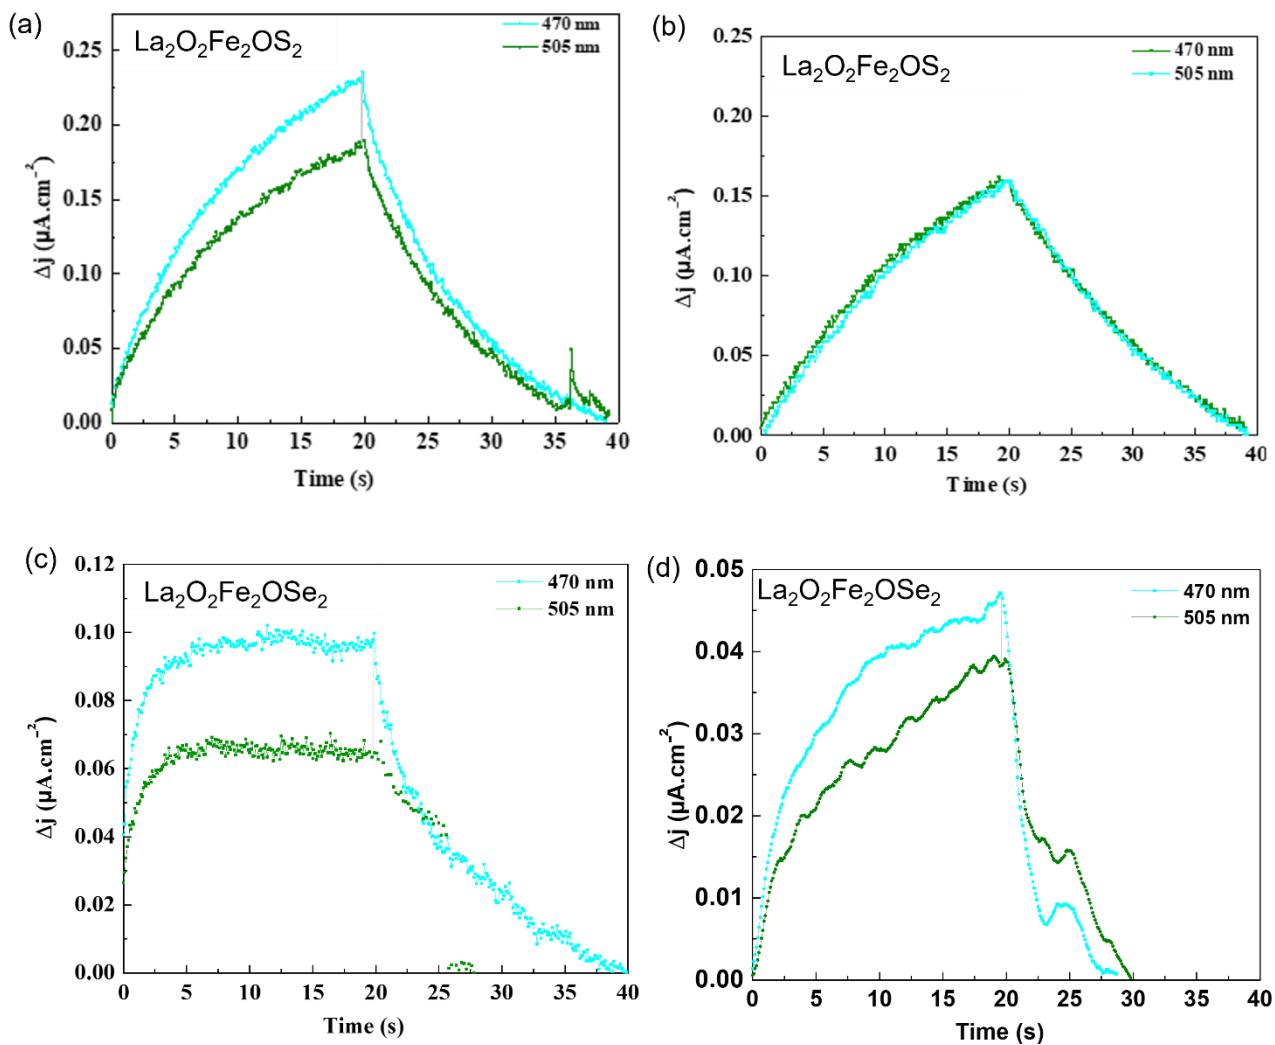

Figure S16 Transient photocurrent response vs. wavelengths (constant light intensity  $\phi_0=42 \text{ mW cm}^{-2}$ ) for  $\text{La}_2\text{O}_2\text{Fe}_2\text{OS}_2$  with (a)  $V_{\text{bias}} = 0.4 \text{ V}$  and (b)  $V_{\text{bias}} = 0.0 \text{ V}$ ; and for  $\text{La}_2\text{O}_2\text{Fe}_2\text{OSe}_2$  with (c)  $V_{\text{bias}} = 0.4 \text{ V}$  and (d)  $V_{\text{bias}} = 0.0 \text{ V}$ .

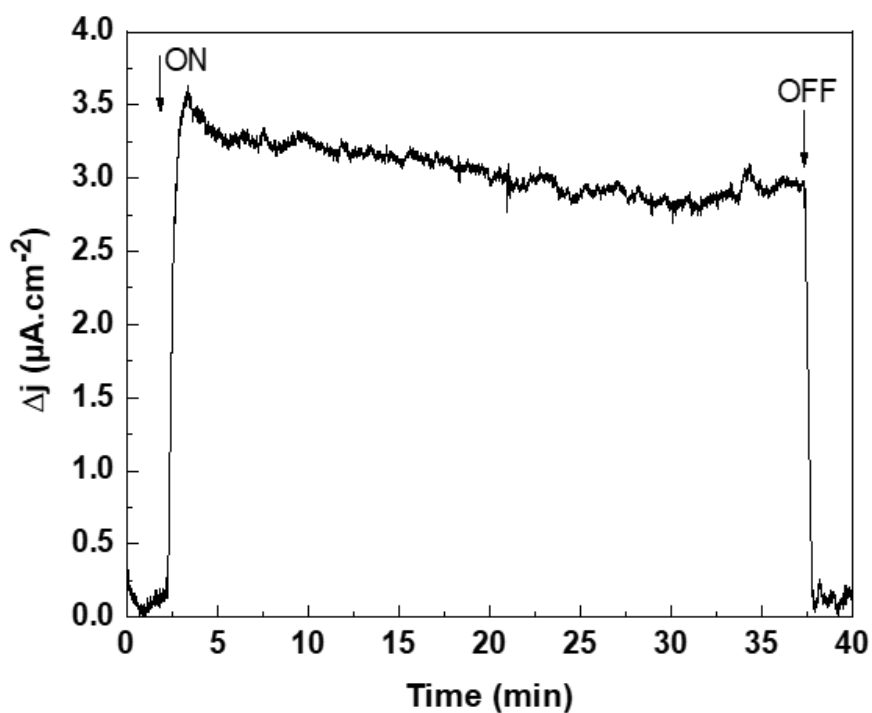

Figure S17 Current density variation for  $\text{La}_2\text{O}_2\text{Fe}_2\text{OS}_2$  at  $V_{bias} = 0.6$  V under solar light excitation with 40 minutes exposure time.

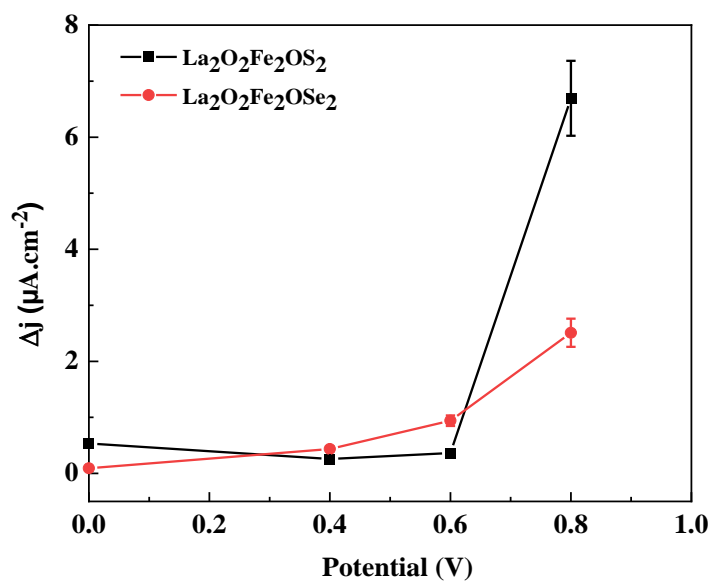

Figure S18 Evolution of the transient photocurrent response vs. potential of  $\text{La}_2\text{O}_2\text{Fe}_2\text{OS}_2$  and  $\text{La}_2\text{O}_2\text{Fe}_2\text{OSe}_2$ .

The photocurrent increased with the intensity of the luminous flux according to a classical power law behaviour<sup>5</sup> with  $\Delta j = 8.63 \times 10^{-3} (2) \Phi^{0.60(2)}$  (Figure S19).

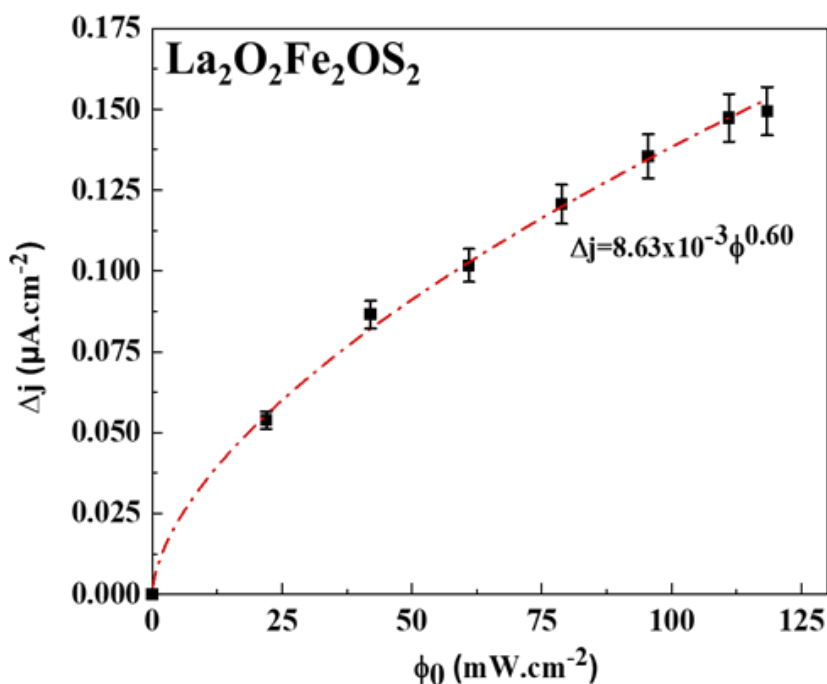

Figure S19 Evolution of the photocurrent density with the power density of light ( $V_{\text{bias}} = 0$  V under a 450 nm excitation) for  $\text{La}_2\text{O}_2\text{Fe}_2\text{OS}_2$ .

1. Butler, M. A.; Ginley, D. S., Prediction of Flatband Potentials at Semiconductor-Electrolyte Interfaces from Atomic Electronegativities. *Journal of The Electrochemical Society* **1978**, *125* (2), 228.
2. Xu, Y.; Schoonen, M. A. A., The absolute energy positions of conduction and valence bands of selected semiconducting minerals. *American Mineralogist* **2000**, *85* (3-4), 543-556.
3. Castelli, I. E.; Landis, D. D.; Thygesen, K. S.; Dahl, S.; Chorkendorff, I.; Jaramillo, T. F.; Jacobsen, K. W., New cubic perovskites for one- and two-photon water splitting using the computational materials repository. *Energy & Environmental Science* **2012**, *5* (10), 9034-9043.
4. Zhu, J.-X.; Yu, R.; Wang, H.; Zhao, L. L.; Jones, M. D.; Dai, J.; Abrahams, E.; Morosan, E.; Fang, M.; Si, Q., Band Narrowing and Mott Localization in Iron Oxychalcogenides  $\text{La}_2\text{O}_2\text{Fe}_2\text{O}(\text{S}, \text{Se})_2$ . *Phys. Rev. Lett.* **2010**, *104* (21), 216405.
5. Shaikh, S. K.; Inamdar, S. I.; Ganbavle, V. V.; Rajpure, K. Y., Chemical bath deposited ZnO thin film based UV photoconductive detector. *Journal of Alloys and Compounds* **2016**, *664*, 242-249.
